# Supplementary material for: Dispersed Oil Disrupts Microbial Pathways in Pelagic Food Webs
Source: PLoS One. 2012 Jul 31;7(7):e42548. doi: 10.1371/journal.pone.0042548 (PMC3409195; doi:10.1371/journal.pone.0042548)
Supplement: Table S1 — Means and standard deviations for the starting conditions for the two experiments along with the p-value from the non-parametric Welch test. (DOCX) [file pone.0042548.s006.docx]

**Table S1.** Means and standard deviations for the starting conditions for the two experiments along with the p-value from the non-parametric Welch test.

|  | June | August | p-value |
| --- | --- | --- | --- |
| Temperature (°C)a | 30.26 (0.7) | 30.84 (0.11) | 0.1372 |
| Salinity (ppt)a | 22.56 (0.65) | 21.94 (1.38) | 0.4005 |
| DO (mg l-1)a | 4.85 (0.49) | 4.45 (0.38) | 0.1907 |
| Prokaryote Cells | 5.24×109 (1.61×108) | 6.68×109 (4.96×108) | **0.0018** |
| Viruses | 7.89×1010 (1.86×109) | 9.37×1010 (1.02×1010) | **0.0302** |
| Dinoflagellates | 1.87×105 (2.95×104) | 1.47×105 (2.89×104) | **0.0314** |
| Diatoms | 4.74×105 (2.43×104) | 9.04×104 (3.31×104) | **0.0001** |
| Ciliates | 3.18×103 (3.18×103) | 3.31×104 (1.91×104) | **0.0237** |
| Flagellates | 5.10×106 (1.02×106) | 2.17×108 (5.04×107) | **0.0007** |
| NO2- | 0.16 (0.03) | 0.65 (0.05) | **0.0001** |
| NO3- | 2.77 (1.87) | 2.82 (0.30) | 0.9544 |
| NH4+ | 2.25 (0.86) | 6.99 (0.81) | **0.0001** |
| PO4-3 | 0.23 (0.05) | 1.39 (0.08) | **0.0001** |
| DON | 21.79 (1.74) | 26.38 (7.87) | 0.2662 |
| N:P | 22.66 (6.14) | 7.51 (0.48) | **0.0051** |

aTests are for t=1 d due to missing data for t=0 in June.
